# Supplementary material for: Impact of COVID-19 on health behaviours and body weight: A prospective observational study in a cohort of 1.1 million UK and US individuals
Source: Research Square preprint supplement (doi:10.21203/rs.3.rs-179013/v1), 2021-02-09
Supplement: Supplementary file 1 [file e3f2fd06d082b542ad85ea7d.xlsx]

## Sheet: Contents
	Title
Supp Table 1	Participant characteristics, with UK and US population averages
Supp Table 2	Cohort descriptives
Supp Table 3	Disruption index
Supp Table 4	Change in continuous data
Supp Table 5	Structural equation modelling
Supp Table 6	Change in categorical data
Supp Table 7	Change in Y/N data
Supp Table 8	PCA loadings
Supp Table 9	Dietary pattern geo-demographic characteristics
Supp Table 10	Change according to dietary pattern
Supp Table 11	Percentile cut-offs for exclusions

## Sheet: T1 Participant Characteristics
Participant Characteristics	All UK respondents (n = 847,942)						US respondents (n = 14,366)						UK Population Average				US Population Average
Sex	Male (%)	Female (%)	Did not answer (%)				Male (%)	Female (%)	Did not answer (%)				Male (%)	Female (%)	All		Male (%)	Female (%)	All
	33.4	66.5	0.1				17.4	82.5	0.1				49.4	50.6			49.2	50.8
	Median	25th	75th				Median	25th	75th
Age (Yrs)	52	40	62				61	47	68						40.5		36.9	39.5	38.2
Weight (kg)	73.4	63.9	85				74.745	64.326	88.335				84.8	72.4	78.4		89.8	77.4
BMI (kg/m2)	25.3	22.8	28.7				26.5907	23.5006	30.9819				27.5	27.5	27.5		29.1	29.6
Smoking
	Yes (%)	Not Currently (%)	Never (%)	Did not answer (%)			Yes (%)	Not Currently (%)	Never (%)	Did not answer (%)			Yes (%)	Yes (%)	Yes (%)		Yes (%)	Yes (%)	Yes (%)
Smoking status	3	13.4	36.5	47.2			3	24.5	72.4	0.1			15.9	12.5	14		15.3	12.7	14
Health
Do you suffer from the following:	Yes (%)	No (%)	Did not answer (%)				Yes (%)	No (%)	Did not answer (%)				Yes (%)	Yes (%)	Yes (%)		Yes (%)	Yes (%)	Yes (%)
Diabetes	3.1	96.9	0				5.2	94.8	0				8	6	7		11	9.5	10.2
Heart disease	2.9	97.1	0				6	94	0				15	13	14		12.6	10.1	11.2
Kidney disease	0.8	99.2	0				1.8	98.1	0				7.4	4.7	6.1		12	15	15
Ethnicity
United Kingdom	Yes (%)	No (%)					United states	Yes (%)	No (%)				Yes (%)				United states	Yes (%)
Asian UK	1.4	98.6					Asian	3.8	96.2				6.8				Asian	5.9
Black UK	0.3	99.7					Black/African American	3.2	96.8				3.4				Black/African American	13.4
Chinese UK	0.3	99.7					Native American	1.3	98.7				0.7				Native American	1.3
Middle Eastern UK	0.3	99.7					Native Hawaiian or Island Pacific	0.4	99.6				0.4				Native Hawaiian or Island Pacific	0.2
White UK	95.8	4.2					White	88.4	11.6				85.9				White	60.1
Mixed other UK	1	99					Other	1.6	98.4				1.1				Other	0.6
Mixed white/black UK	0.4	99.6					Prefer not to say	0.9	99.1				1.1
Other	0.4	99.6											0.6
Prefer not to say	0.3	99.7											n/a
Geographical
	England (%)	Scotland (%)	Wales (%)	Northern Ireland (%)	Did not answer (%)								England (%)
UK location	80.7	5.4	4.7	0.6	8.6								84.3
Index of Multiple Deprivation
1	1.8												9.9
2	3.4												10
3	5												10.2
4	6.5												10.1
5	7.9												10.1
6	9.6												10.1
7	10.6												9.9
8	11.5												10
9	12.9												9.9
10	16.1												9.8
Missing (0)	14.6												n/a

## Sheet: T2 Cohort descriptives
Participant Characteristics	UK discovery cohort (Changed, n = 136,861)						UK discovery cohort (No change, n = 70,861)						UK validation cohort (All Changed, n = 57,515)						UK validation cohort (All No Change, n = 19,353)						UK validation cohort (Response: No, NO CHANGE k = 207,462)						UK validation cohort (Response: Maybe, NO CHANGE n = 51)						UK validation cohort (Response: Yes, NO CHANGE, n = 19,302)
Sex	Male (%)	Female (%)					Male (%)	Female (%)					Male (%)	Female (%)					Male (%)	Female (%)					Male (%)	Female (%)					Male (%)	Female (%)					Male (%)	Female (%)
	23.6	76.4					32.4	67.4					23.6	76.4					36.2	63.8					38.1	61.9					25.5	74.5					25.1	74.8
	Median	25th	75th				Median	25th	75th				Median	25th	75th				Median	25th	75th				Median	25th	75th				Median	25th	75th				Median	25th	75th
Age (Yrs)	49	39	58				59	49	67				49	39	58				53	42	64				52	41	62				45	37	58				51	40	60
Weight (kg)	75	65	87				71.6	62.5	82.9				75	65	87				72	62.5	83				72	62.1	83				70	58.4	81.5				73.8	64	85.6
BMI (kg/m2)	26.3	23.5	30.1				24.8	22.5	28				26.3	23.5	30.1				24.6	22.3	27.8				24.6	22.2	27.5				24.1	21.7	29.3				25.8	23.1	29.5
Smoking
Smoking status	Yes (%)	Not Currently (%)	Never (%)	Did not answer (%)			Yes (%)	Not Currently (%)	Never (%)	Did not answer (%)			Yes (%)	Not Currently (%)	Never (%)	Did not answer (%)			Yes (%)	Not Currently (%)	Never (%)	Did not answer (%)			Yes (%)	Not Currently (%)	Never (%)	Did not answer (%)			Yes (%)	Not Currently (%)	Never (%)	Did not answer (%)			Yes (%)	Not Currently (%)	Never (%)	Did not answer (%)
	2.9	13.9	35.1	48			2.2	14	37.1	46.7			3	13.9	35.1	48			3	14.8	41.9	40.2			3	13.5	38.1	45.4			1.96	11.76	39.22	47.06			2.9	14.4	35.5	47.2
Health
Do you suffer from the following:	Yes (%)	No (%)	Did not answer (%)				Yes (%)	No (%)	Did not answer (%)				Yes (%)	No (%)	Did not answer (%)				Yes (%)	No (%)	Did not answer (%)				Yes (%)	No (%)	Did not answer (%)				Yes (%)	No (%)	Did not answer (%)				Yes (%)	No (%)	Did not answer (%)
Diabetes	2.9	97.1	0				3.9	96.1	0				2.9	97.1	0				2.8	97.2	0				2.5	97.5	0				5.9	94.1	0				2.8	97.2	0
Heart disease	2.5	97.5	0				3.9	96.1	0				2.5	97.5	0				3.2	96.7	0				2.8	97.2	0				0	100	0				2.7	97.3	0
Kidney disease	0.7	99.3	0				0.9	99.1	0				0.7	99.3	0				0.8	99.2	0				0.7	99.3	0				0	100	0				0.8	99.2	0
Ethnicity
United Kingdom	Yes (%)	No (%)					Yes (%)	No (%)					Yes (%)	No (%)					Yes (%)	No (%)					Yes (%)	No (%)					Yes (%)	No (%)					Yes (%)	No (%)
Asian UK	1.6	98.4					0.8	99.2					1.6	98.4					1.1	98.9					1.2	98.8					2	98					1.6	98.4
Black UK	0.4	99.6					0.2	99.8					0.4	99.6					0.3	99.7					0.3	99.7					0	100					0.4	99.6
Chinese UK	0.3	99.7					0.2	99.8					0.3	99.7					0.3	99.7					0.3	99.7					0	100					0.5	99.5
Middle Eastern UK	0.4	99.6					0.2	99.8					0.4	99.6					0.3	99.7					0.3	99.7					0	100					0.4	99.6
White UK	95.1	4.9					97.2	2.8					95.1	4.9					85.4	14.6					96.3	3.7					96.1	3.9					94.8	5.2
Mixed other UK	1.2	98.8					0.7	99.3					1.2	98.8					0.8	99.2					0.8	99.2					0	100					1.3	98.7
Mixed white/black UK	0.4	99.6					0.2	99.8					0.4	99.6					0.3	99.7					0.3	99.7					0	100					0.4	99.6
Other	0.5	99.5					0.4	99.6					0.5	99.5					0.5	99.5					0.4	99.6					2	98					0.5	99.5
Prefer not to say	0.3	99.7					0.2	99.8					0.3	99.7					0.3	99.7					0.3	99.7					0	100					0.2	99.8
Geographical
	England (%)	Scotland (%)	Wales (%)	Northern Ireland (%)	Did not answer (%)		England (%)	Scotland (%)	Wales (%)	Northern Ireland (%)	Did not answer (%)		England (%)	Scotland (%)	Wales (%)	Northern Ireland (%)	Did not answer (%)		England (%)	Scotland (%)	Wales (%)	Northern Ireland (%)	Did not answer (%)		England (%)	Scotland (%)	Wales (%)	Northern Ireland (%)	Did not answer (%)		England (%)	Scotland (%)	Wales (%)	Northern Ireland (%)	Did not answer (%)		England (%)	Scotland (%)	Wales (%)	Northern Ireland (%)	Did not answer (%)
UK location	81	5.6	4.7	0.6	8.1		81	5.1	4.5	0.5	8.8		81	5.6	4.7	0.6	8.1		71.9	4.6	3.9	0.5	19		81.4	5.2	4.5	0.6	8.3		88.2	2	2	3.9	3.9		81.8	5.3	4.3	0.7	7.8
Index of Multiple Deprivation
1	2						1.4						2						1.4						1.6						2						1.6
2	3.7						2.8						3.7						2.7						3						7.8						3.5
3	5.5						4.4						5.5						4						4.5						11.8						5.2
4	7						6						6.9						5.6						6.2						13.7						7
5	8.1						7.7						8.1						7						7.9						7.8						8.1
6	9.8						9.5						9.8						8.6						9.7						0						9.8
7	10.5						10.9						10.5						9.6						10.9						3.9						10.7
8	11.3						12						11.3						10.3						11.7						15.7						11.6
9	12.6						13.5						12.6						11.8						13.4						13.7						12.9
10	15.2						17.3						15.3						14.9						17						13.7						15.7
Missing (0)	14.3						14.5						14.3						24.1						14.1						9.8						13.8

## Sheet: T3 Disruption Index
	UK discovery cohort							US repetition cohort								UK discovery cohort														UK discovery Cohort								US repetition cohort
	Disruption index score							Disruption index score								Low Disruption index							High Disruption index							UK cohort								US cohort
	0	1	2	3	4	5		0	1	2	3	4	5			Low IMD (1-3)			High IMD (8-10)				Low IMD (1-3)			High IMD (8-10)					Low Disruption index			High Disruption index					Low Disruption index			High Disruption index
Index of multiple deprivation (%)																Mean	10th	90th	Mean	10th	90th		Mean	10th	90th	Mean	10th	90th			Mean	10th	90th	Mean	10th	90th			Mean	10th	90th	Mean	10th	90th
IMD 1	8.2	21.1	27.2	24.3	14.6	4.6									Weight															Weight								Weight
IMD 2	8.7	22.6	28.1	23.4	13.4	3.8									Weight change	0.05	-3	3	-0.05	-2.8	2.26		-0.05	6.79	6.34	-0.6	7	5		Weight change	-0.026	-3	2.26	-0.45	-7	5		Weight change	-0.3219	-5.889	4.53	-0.36	-8.154	6.342
IMD 3	9.4	24.7	28.2	22.4	11.9	3.5									Weight gain	3.06	0.85	6.34	3.04	0.49	5		4.41	1	9	3.81	0.99	8		Weight gain	3.05	0.5	5.43	4.02	1	8		Weight gain	3.3795	0.906	6.795	4.4588	1.359	9.06
IMD 4	9.8	25.3	28.3	22.1	11.3	3.2									Weight loss	-3.51	-6.79	-0.9	-3.18	-6	-0.6		-5.25	-10	-1	-5.12	10.41	-1.01		Weight loss	-3.2	-6.34	-0.6	-5.2	-10.9	-1		Weight loss	-4.5807	-9.513	-0.906	-5.6797	-11.325	-1.359
IMD 5	10.1	26	28.5	21.7	11	2.8
Region (%)
England	9.6	24.9	28.3	22.2	11.7	3.2
Scotland	9.1	24.7	28.3	22.3	12.2	3.4
Wales	10.1	24.9	27.3	22.9	11.5	3.3
Northern Ireland	10.8	25.6	28	20	11.7	4
Smoking status (%)
Never	10.1	26.1	28.8	21.6	10.6	2.9		6.7	23.3	27.3	19	16.4	7.4
Not currently	10.5	26.9	28.3	20.8	10.6	2.9		8.9	23.9	28.3	18.2	14.7	5.9
Yes	9.5	26	27.1	21.5	12.2	3.7		6.8	18.8	26.6	20.3	17.2	10.4
Age (%)
18-25	2.3	9.1	20.2	31	26.3	11		1	9.6	17.9	21.7	32.6	17.3
25-35	4.1	13.2	24.1	29.5	21.4	7.8		3.1	12.4	25.2	22.3	24.1	12.9
35-45	5.6	16.6	25.4	27.9	18.3	6.1		4.7	17.4	26.1	20.9	21.5	9.4
45-55	7.3	20.7	27.4	25.5	14.7	4.3		5.9	18.7	25.6	22.3	18.1	9.4
55-65	10.5	26.5	29.2	21.4	10	2.4		7.9	25.4	28.6	17.6	14.3	6.3
65 and above	13.3	32.5	30.3	16.7	6.1	1.1		9.7	29.7	29.8	16.5	10.7	3.6
Total and sex (%)
Total	9.6	24.9	28.3	22.2	11.7	3.3		7.2	23.3	27.5	18.9	16.1	7.1
Female	8.4	22.7	28.2	23.9	13.1	3.7		6.9	22.8	27.7	19.2	16.3	7.1
Male	12.4	29.8	28.5	18.5	8.6	2.2		8.5	25.8	26.6	17.3	14.9	6.8

## Sheet: T4 Change in continuous data 
	UK discovery cohort																												UK validation cohort
	Pre Pandemic						Peri Pandemic						Mean size of change				% of participants who increased		Size of change in participants who increased				% of participants who decreased		Size of change in participants who decreased				Pre Pandemic						Peri Pandemic						Mean size of change				% of participants who increased		Size of change in participants who increased
	Mean	SD	Median	25th	75th		Mean	SD	Median	25th	75th		Mean	10th	90th		%		Mean	10th	90th		%		Mean	10th	90th		Mean	SD	Median	25th	75th		Mean	SD	Median	25th	75th		Mean	10th	90th		%		Mean	10th	90th
Anthropometrics
Weight (kg)	74.9355	15.7793	72.027	63	84.258		74.8287	15.6021	72.027	63	84		-0.1068	-4.077	3.624		34		3.4725	0.906	6.342		32		-4.0078	-8.154	-0.906		77.1	16.5	74.3	64.8	87		77.2	16.2	74.8	65	87		0.1496	-6.342	5.889		49		4.0867	1	7.701
BMI (kg/m2)	25.981	4.29465	25.1459	22.7774	28.3958		25.9427	4.2864	25.0768	22.7732	28.3137		-0.0387	-1.4507	1.2097		34		1.1237	0.299	2.3267		32		-1.3038	-2.9086	-0.3075		27.1	5.4	26.1	23.3	30		27.2	5.4	26.2	23.4	30		0.0678	-2.2143	2.0112		49		1.4627	0.3653	2.7337
LSFFFQ Diet
Diet quality score (5-15)	10.84	1.814	11	10	12		11.13	1.794	11	10	12		0.2952	-2	2		39		1.8279	1	3		26		-1.6515	-3	-1		10.5	1.9	11	9	12		10.9	1.9	11	10	12		0.4112	-2	3		44		2.1797	1	4
Fruit portions	1.99	1.3217	1	2	3		2.143	1.3073	1	2	3		0.1559	-1	1		24		1.4815	1	3		15		-1.3297	-2	-1		1.774	1.2994	2	1	2.5		1.99	1.2325	2	1	3		0.218	-1	2		32		1.5323	1	3
Vegetable portions	2.538	1.3478	2	2	3		2.678	1.3143	3	2	3		0.1445	-1	1		23		1.6149	1	3		17		-1.3654	-2	-1		2.414	1.3961	2	2	3		2.69	1.2869	3	2	3		0.2798	-1	2		31		1.6988	1	3
Fruit juice/veg juice portions	0.325	0.5994	0	0	1		0.346	0.6188	0	0	1		0.022	0	0		8		1.3376	0.5	3		6		-1.3426	-3	-1		0.314	0.6049	0	0	0.5		0.335	0.6103	0	0	1		0.0215	0	0.5		11		1.2096	0.5	2
Sleep
Weekday nights sleep (Sun-Thurs) (hrs mins)	6.97	0.96	7	6	8		7.04	0.941	7	6	8		0.0715	0	1		15		1.1939	1	2		9		-1.204	-2	-1		6.87	1.005	7	6	8		6.98	0.975	7	6	8		0.1101	-1	1		33		1.2424	1	2
Weekend nights sleep (Fri-Sat) (hrs mins)	7.37	1.076	7	7	8		7.34	1.046	7	7	8		-0.0387	-1	0		8		1.2248	1	2		11		-1.244	-2	-1		7.48	1.171	8	7	8		7.42	1.115	7	7	8		-0.0657	-1	1		24		1.2976	1	2
Eating behaviours
Number of main meals (not including breakfast) (integer)	1.87	0.667	2	2	2		1.91	0.609	2	2	2		0.036	0	0		7		1.4067	1	2		6		-1.1462	-2	-1		1.92	0.71	2	2	2		1.99	0.586	2	2	2		0.0694	0	1		12		1.4091	1	2
Number of snacks (integer)	1.58	1.111	2	1	2		1.53	1.049	1	1	2		-0.0516	-1	1		18		1.3901	1	2		22		-1.3374	-2	-1		1.8	1.207	2	1	3		1.79	1.096	2	1	2		-0.0088	-2	2		30		1.4885	1	2

## Sheet: T5 Structural equation modellin
Weight gain
Overall							High IMD							Low IMD
			Standardised β	SE	P-value					Standardised β	SE	P-value					Standardised β	SE	P-value
Age	→	Weight gain	0.014	0.001	0.057		Age	→	Total sleep change	0.02	0.252	0.075		Age	→	Total sleep change	0.01	0.001	0.478
Age	→	Total sleep change	-0.002	0.002	0.761		Age	→	Weight gain	0.03	0.003	0.008		Age	→	Weight gain	0.001	0.003	0.953
Age	→	Snacking change	-0.066	0.001	<0.001		Age	→	Snacking change	-0.044	0.001	<0.001		Age	→	Snacking change	-0.082	0.001	<0.001
Age	→	Diet score change	0.122	0.001	<0.001		Age	→	Diet score change	0.132	0.001	<0.001		Age	→	Diet score change	0.132	0.001	<0.001
Age	→	Alcohol frequency change	-0.106	0.001	<0.001		Age	→	Alcohol frequency change	-0.12	0.001	<0.001		Age	→	Alcohol frequency change	-0.098	0.001	<0.001
Age	→	Physical activity change	0.03	0.001	<0.001		Age	→	Physical activity change	-0.006	0.001	0.665		Age	→	Physical activity change	0.074	0.001	<0.001
Alcohol frequency change	→	Weight gain	0.034	0.026	<0.001		Alcohol frequency change	→	Weight gain	0.028	0.044	0.021		Alcohol frequency change	→	Weight gain	0.05	0.047	0.001
Diet score change	→	Weight gain	-0.086	0.011	<0.001		Physical activity change	→	Weight gain	-0.076	0.023	<0.001		Physical activity change	→	Weight gain	-0.124	0.024	<0.001
Snacking change	→	Weight gain	0.056	0.012	<0.001		Snacking change	→	Weight gain	0.046	0.017	<0.001		Snacking change	→	Weight gain	0.088	0.023	<0.001
Physical activity change	→	Weight gain	-0.1	0.014	<0.001		Diet score change	→	Weight gain	-0.072	0.019	<0.001		Diet score change	→	Weight gain	-0.124	0.02	<0.001
Total sleep change	→	Weight gain	0.01	0.003	0.972		Total sleep change	→	Weight gain	0.002	0.004	0.845		Total sleep change	→	Weight gain	0.002	0.001	0.93
Weight loss
Overall							High IMD							Low IMD
			Standardised β	SE	P-value					Standardised β	SE	P-value					Standardised β	SE	P-value
Age	→	Snacking change	0.004	0.011	0.516		Age	→	Physical activity change	-0.294	0.001	<0.001		Age	→	Snacking change	0.004	0.046	0.794
Age	→	Alcohol frequency change	-0.028	0.001	<0.001		Age	→	Alcohol frequency change	-0.05	0.001	<0.001		Age	→	Diet score change	-0.164	0.001	<0.001
Age	→	Physical activity change	-0.27	0.001	<0.001		Age	→	Diet score change	-0.162	0.001	<0.001		Age	→	Physical activity change	-0.234	0.001	<0.001
Age	→	Diet score change	-0.166	0.001	<0.001		Age	→	Snacking change	0.138	0.001	<0.001		Age	→	Alcohol frequency change	-0.022	0.001	0.175
Age	→	total sleep	-0.008	0.088	0.242		Age	→	Total sleep change	-0.018	0.036	0.142		Age	→	Total sleep change	0.002	0.039	0.851
Age	→	Weight gain	0.076	0.001	<0.001		Age	→	Weight gain	0.062	0.002	<0.001		Age	→	Weight gain	0.094	0.003	<0.001
Alcohol frequency change	→	Weight gain	0.138	0.024	<0.001		Alcohol frequency change	→	Weight gain	0.134	0.038	<0.001		Alcohol frequency change	→	Weight gain	0.14	0.046	<0.001
Physical activity change	→	Weight gain	-0.206	0.013	<0.001		Physical activity change	→	Weight gain	-0.162	0.021	<0.001		Physical activity change	→	Weight gain	-0.236	0.025	<0.001
Snacking change	→	Weight gain	-0.004	0.001	0.562		Snacking change	→	Weight gain	0.128	0.02	<0.001		Snacking change	→	Weight gain	-0.018	0.001	0.254
Diet score change	→	Weight gain	-0.25	0.01	<0.001		Diet score change	→	Weight gain	-0.228	0.017	<0.001		Diet score change	→	Weight gain	-0.288	0.02	<0.001
Total sleep change	→	Weight gain	0.004	0.001	0.659		Total sleep change	→	Weight gain	0.024	0.001	0.033		Total sleep change	→	Weight gain	-0.006	0.001	0.708

## Sheet: T6 Change in categorical data 
	UK discovery cohort																								UK validation cohort																								US replication cohort
	Pre Pandemic (n = 207,722)									Peri Pandemic ( n = 207,722)									% of participants who increased		% of participants who stayed the same		% of participants who decreased		Pre Pandemic									Peri Pandemic									% of participants who increased		% of participants who stayed the same		% of participants who decreased		Pre Pandemic (n = 14,366)
	Rarely or never (%)	<1 a week (%)	Once a week (%)	2-3 times a week (%)	4-6 times a week (%)	1-2 times a day (%)	3-4 times a day (%)	5+ times a day (%)		Rarely or never (%)	<1 a week (%)	Once a week (%)	2-3 times a week (%)	4-6 times a week (%)	1-2 times a day (%)	3-4 times a day (%)	5+ times a day (%)		Mean		Mean		Mean		Rarely or never (%)	<1 a week (%)	Once a week (%)	2-3 times a week (%)	4-6 times a week (%)	1-2 times a day (%)	3-4 times a day (%)	5+ times a day (%)		Rarely or never (%)	<1 a week (%)	Once a week (%)	2-3 times a week (%)	4-6 times a week (%)	1-2 times a day (%)	3-4 times a day (%)	5+ times a day (%)		Mean		Mean		Mean		Rarely or never (%)
LSFFFQ Diet
Fruit (tinned / fresh)	8	3.9	4.9	16.8	19.9	30.6	11.6	4.3		4.9243	2.6005	3.8122	12.0871	16.4413	35.0196	17.0487	8.0664		38		50.3		11.7		10.1	5.5	6.5	20.4	18	26.9	9.4	3.1		5.8	3.5	5.4	15.8	16.4	33.6	13.6	6		41.6		41.2		17.2		8
Fruit juice (not cordial or squash)	60.7	8.2	6.2	7.9	6.1	10.1	0.4	0.4		56.6104	9.1417	6.2165	8.8125	6.2493	11.3512	0.78	0.8384		17.9		71.6		10.5		59.8	9.9	8.1	9.3	4.9	7.2	0.4	0.3		56	11.2	8.1	9.8	5.4	8.2	0.7	0.6		20.7		64.5		14.8		71.7
Salad (not garnish added to sandwiches)	8.4	9	17.2	37.3	16.2	10	0.9	0.8		6.2415	5.9094	13.7005	35.7844	21.4515	14.0552	1.3873	1.4702		32.8		53.3		13.9		9.9	10.2	18.1	35.4	15.6	9.1	0.9	0.8		6.7	7	14.6	35	19.7	14.2	1.4	1.3		38.2		42.5		19.3		8.1
Vegetables (tinned / frozen / fresh but not potatoes)	1.2	0.9	2.3	18.1	29.8	31.7	11.5	4.5		1.0062	0.9291	2.0805	12.9799	27.1121	36.1567	12.8602	6.8753		27.6		57.8		14.6		1.5	1.3	3.1	21.3	27.8	29.2	11.7	4		1.1	1.1	2.6	15.2	25	35.4	13.6	6.1		32.5		50.1		17.4		2.1
Chips / fried potatoes	37.6	19.9	27.5	12.6	1.5	0.6	0.2	0.1		34.6	26.3	26.8	10	1.2	0.7	0.2	0.1		17.4		63.7		18.9		31.2	18.8	28.8	17.6	2.6	0.7	0.2	0.1		29.8	26	28.3	13	1.7	0.8	0.3	0.1		22		50.2		27.8		42.5
Beans or pulses like baked beans, chick peas, dahl	12.5	13.3	30.4	35.6	5.8	2	0.3	0.1		9.23197	13.8021	30.0781	35.9664	7.37665	2.74129	0.56464	0.23891		23.5		61.7		14.8		14.7	13.6	29.3	33.9	6	2	0.3	0.1		10.5	14.1	29.4	35	7.3	2.9	0.5	0.2		28.3		52.3		19.4		18.5
Fibre-rich breakfast cereal, like Weetabix, Fruit ‘n Fibre, Porridge, Muesli	25.1	5.4	6.5	14.8	26.2	20.1	0.2	1.7		23.0272	6.2891	6.6889	13.9831	25.1033	22.0892	0.3336	2.4857		19.5		66.2		14.3		29.2	6.9	7.9	17.1	22.8	14.5	0.3	1.3		27	8.2	8.2	16.4	21.6	16.4	0.3	1.8		24.4		55.1		20.5		43.6
Wholemeal bread or chapattis	21	6.7	10.1	25.9	19.6	15.3	0.7	0.8		19.3	7.7	9.3	24.3	20.4	17	0.9	1.1		23.3		60		16.7		24	7.9	11.2	26.9	17.2	11.6	0.7	0.6		22.3	9.1	11	25.6	17.5	13	0.8	0.8		27.9		49.2		22.9		21.1
Cheese / yoghurt	6.1	3	7	32.4	29.2	20.2	1	1.1		5	2.8	6.4	28.4	31.2	23.1	1.4	1.7		24.2		61.4		14.4		7	3.5	7.7	33.8	27.8	18	1.2	1		5.8	3.2	7	30.6	29	21.6	1.4	1.4		28.6		52.1		19.3		7.7
Crisps / savoury snacks	26.4	11.1	15.5	26.7	12.8	6.8	0.5	0.3		22.8	13.6	17.1	27.4	12.5	5.7	0.5	0.4		17.7		59.4		22.9		21	10	14.6	28.3	15.9	8.9	0.8	0.4		18	12.1	16.4	29.7	14.8	7.8	0.6	0.5		31.4		37.6		31		23.1
Sweet biscuits, cakes, chocolate, sweets	15.4	7.1	10.4	28.2	18.6	17.6	2.1	0.6		12.3814	8.0006	10.7797	27.8195	20.6538	17.629	1.8426	0.8933		27.6		50.1		22.3		13.3	7.2	10.5	28.1	19.6	17.4	3	1		10.9	7.7	10.7	27.8	20.8	18.5	2.6	1.2		35.1		34.8		30.1		16.4
Ice cream / cream	46.8	21.3	17.3	11.2	2.4	0.9	0.1	0.1		35.8903	23.843	19.658	15.5333	3.59	1.1975	0.1795	0.1084		28.7		59.3		12		48.3	21.2	16.9	10.4	2.1	1	0.1	0.1		35.3	24	20.2	15.3	3.5	1.3	0.2	0.1		35.3		48.4		16.3		36.1
Non alcoholic fizzy drinks/pop (not sugar free or diet)	76.4	7	5	5.8	2.6	2.3	0.5	0.4		74.2801	8.5251	5.2451	5.8539	2.7074	2.3959	0.5715	0.4209		11.1		79.9		9		69.3	8	6.2	7.8	3.7	3.3	1	0.7		67.7	10	6.5	7.4	3.4	3.4	1	0.7		15		70.8		14.2		72.8
Beef, Lamb, Pork, Ham - steaks, roasts, joints, mince or chops	17.9	8.3	20.9	42.4	8.7	1.5	0.3	0.2		18.2064	9.7034	20.1064	38.4202	10.4932	2.2738	0.5416	0.2551		15.8		69.3		14.9		18.2	8.1	20.2	41.5	9.3	2.1	0.4	0.2		18.5	9.4	19.4	37.4	11	3.4	0.6	0.3		20.3		61.5		18.2		18.1
Chicken or Turkey – steaks, roasts, joints, mince or portions (not in batter or breadcrumbs)	14.5	5.1	20.2	50.7	7.9	1.3	0.3	0.1		14.5	6.4	20.3	47.4	9	1.8	0.5	0.2		12.7		73.7		13.6		14.5	4.5	16.9	50.6	10.9	2.1	0.4	0.2		14.6	5.8	17.2	47	11.7	2.8	0.6	0.3		15.9		67.2		16.9		10.1
Sausages, bacon, corned beef, meat pies/pasties, burgers	29.1	16.9	29.9	20.8	2.5	0.7	0.1	0		28.0633	21.9205	29.1284	18.0926	2.028	0.6426	0.08	0.0446		16.1		63.3		20.6		27.1	14.4	28.3	25.3	3.7	1	0.1	0		26.6	20.1	29.2	20.6	2.5	0.8	0.1	0.1		19.5		53.7		26.8		31.2
Chicken/turkey nuggets/twizzlers, turkey burgers, chicken pies, or in batter or breadcrumbs	78.6	9.1	8.1	3.8	0.3	0.1	0	0		78.8	11.7	6.6	2.6	0.2	0.1	0	0		8.4		81.1		10.5		71.4	10.9	11	5.9	0.6	0.2	0	0		73.3	14.1	8.7	3.4	0.4	0.1	0	0		10.7		73.5		15.8		58.8
White fish in batter or breadcrumbs – like ‘fish ‘n chips’	43.4	26.2	25.5	4.4	0.3	0.2	0	0		43.4	28.8	21.2	5.8	0.5	0.2	0.1	0		14.4		69.2		16.4		43	26	25.8	4.6	0.3	0.2	0	0		37.2	25.6	27.9	8.3	0.5	0.4	0	0		16.9		63.2		19.9		66.4
White fish not in batter or breadcrumbs	33.9	22.6	32.8	9.9	0.5	0.3	0	0		33.0823	25.4521	31.1765	9.37472	0.4994	0.32623	0.06328	0.02551		14.1		69.9		16		40	22.6	28.3	8.3	0.5	0.3	0	0		43.3	29.4	21.1	5.3	0.5	0.3	0.1	0		18.1		64.8		17.1		41.8
Oily fish – like herrings, sardines, salmon, trout, mackerel, fresh tuna (not tinned tuna)	24.1	16.6	37.5	19.7	1.4	0.5	0.1	0		23.0188	19.3254	36.5609	18.9074	1.5747	0.4852	0.0854	0.0422		13.2		71.8		15		29.8	17.7	33.9	16.7	1.4	0.4	0.1	0		27.3	20.5	33.7	16.4	1.5	0.5	0.1	0		17.8		64.9		17.3		38.1
Other Diet (Additional Qu added by research team)
Eggs - as boiled, fried, scrambled, etc	9.6	9.8	28.2	39.5	9.6	2.9	0.2	0.3		9.00533	11.0642	26.9964	37.728	11.282	3.23872	0.338	0.347321		16.7		67.4		15.9		10.5	9.6	26.4	38.5	11	3.4	0.3	0.3		9.1	10.1	24.2	37.7	13.7	4.4	0.4	0.4		24.8		55.9		19.3		10.2
Fast food	64.8	15.8	14.5	4.3	0.4	0.1	0	0		69.3146	18.3737	10.4265	1.6434	0.1585	0.0692	0.0093	0.0049		8.4		74.1		17.5		48.1	19	22.3	9.4	0.9	0.2	0	0		54.7	23.6	17.2	3.9	0.3	0.1	0	0		13.9		57.3		28.8		48.1
Live probiotic or fermented food products (e.g. sauerkraut, kimchi, yakult, live yogurt, kefir)	60.1	8.5	6.5	9.8	7.9	6.6	0.1	0.4		56.1252	10.6262	6.7183	10.3097	8.738	6.7953	0.1761	0.5112		14.3		75.4		10.3		64.6	9	7.1	9.1	5.7	4.1	0.1	0.3		58.6	11.8	7.6	10.1	6.5	4.9	0.2	0.4		17.9		70.9		11.2		51.1
White bread	52	10.7	10.3	15.7	7.1	3.8	0.2	0.2		52.665	12.6875	9.2415	14.279	6.9032	3.8201	0.2129	0.1908		14.8		68.3		16.9		43.7	11.6	11.6	18.7	8.9	4.9	0.4	0.2		45.6	13.7	11	17	7.6	4.5	0.3	0.2		20.7		54.1		25.2		50
Rice	11.3	12.3	38	34.9	2.8	0.6	0.1	0		11.8217	16.7505	37.7002	30.4641	2.47	0.6096	0.1362	0.0477		10.7		70.1		19.2		10.8	10.6	35.1	38.6	3.9	0.8	0.1	0.1		11.9	15.2	36.2	32.5	3.2	0.8	0.1	0.1		14.4		60.7		24.9		18.9
Pasta	11.8	11.1	38.4	35.9	2.4	0.4	0.1	0		12.4554	15.6438	39.8801	29.8338	1.6495	0.4504	0.0664	0.0206		9.2		71.1		19.7		11	9.4	34.1	40.8	4	0.6	0.1	0		12.8	14.5	37.4	32.3	2.5	0.5	0.1	0		12.2		61		26.8		16.1
Refined breakfast cereals (e.g. rice krispies, cornflakes, coco pops)	79.6	5.6	4.7	5.7	3	1.3	0	0.1		80.0395	5.9834	4.2778	5.2257	3.0261	1.2842	0.0403	0.1229		7.4		84.4		8.2		75.2	6.9	6	7.2	3.1	1.4	0	0.1		76.5	7.6	5.4	6.3	2.9	1.2	0	0.1		10.3		77.3		12.4		66
Alcohol
Alcohol frequency (multiple choice)	Never	Monthly	2-4 times a month	2-4 times a week	4 or more times a week	Prefer not to answer				Never	Monthly	2-4 times a month	2-4 times a week	4 or more times a week	Prefer not to answer				18.4		70.4		11.2		Never	Monthly	2-4 times a month	2-4 times a week	4 or more times a week	Prefer not to answer				Never	Monthly	2-4 times a month	2-4 times a week	4 or more times a week	Prefer not to answer				25.7		58.4		15.9		Never
	14.2	9.5	19	34.8	22.4	0				14.7	8	18.6	30.9	27.8	0										15.1	12.5	22.2	34	16.2	0				15.4	10.5	21	31.4	21.8	0										28
Alcohol quantity (multiple choice) (units)	1 or 2	3 or 4	5 or 6	7, 8 or 9	10 or more	Prefer not to answer				1 or 2	3 or 4	5 or 6	7, 8 or 9	10 or more	Prefer not to answer				10.7		75.8		13.5		1 or 2	3 or 4	5 or 6	7, 8 or 9	10 or more	Prefer not to answer				1 or 2	3 or 4	5 or 6	7, 8 or 9	10 or more	Prefer not to answer				15.2		66.4		18.4		1 or 2
	0	48.9	29.4	12	6.4	3.2				0	51	28.1	11.7	6.2	3.1										0	45.4	29.9	13.7	7.5	3.5				0	47.8	28.8	12.7	7.6	3.1										0.1
Physical Activity, Food Access
Physical Activity - Frequency of raised heart rate >20mins (multiple choice)	Less than once a month	At least once per month, but less than once per week	About once a week	About twice a week	3-4 times a week	5 or more times a week				Less than once a month	At least once per month, but less than once per week	About once a week	About twice a week	3-4 times a week	5 or more times a week				26.6		48.2		25.2		Less than once a month	At least once per month, but less than once per week	About once a week	About twice a week	3-4 times a week	5 or more times a week				Less than once a month	At least once per month, but less than once per week	About once a week	About twice a week	3-4 times a week	5 or more times a week				30.7		35.7		33.6		Less than once a month
	8.6	5.7	14.1	21.4	28.7	21.4				9.578	7.047	12.419	18.831	26.682	25.443										12	8.8	18.8	22.5	22.6	15.2				12.6	11	17.6	21.5	20.1	17.2										11.8
Food Access - food eaten in household (multiple choice)	You all always had enough of the kinds of foods you wanted to eat	You all had enough to eat, but not always the kinds of food you wanted	You sometimes did not have enough to eat	You often didn't have enough ton eat						You all always ad enough of the kinds of foods you wanted to eat	You all had enough to eat, but not always the kinds of food you wanted	You sometimes did not have enough to eat	You often didn't have enough ton eat						1.4		92.8		5.8		You all always had enough of the kinds of foods you wanted to eat	You all had enough to eat, but not always the kinds of food you wanted	You sometimes did not have enough to eat	You often didn't have enough ton eat						You all always had enough of the kinds of foods you wanted to eat	You all had enough to eat, but not always the kinds of food you wanted	You sometimes did not have enough to eat	You often didn't have enough ton eat						3.4		86.7		9.9		You all always had enough of the kinds of foods you wanted to eat
	96.6	3.2	0.2	0						92.2825	7.3277	0.333	0.0568												93.3	6	0.5	0.1						86.9	12.1	0.8	0.2												94.1
[truncated: 18 more columns]

## Sheet: T7 Change in YN data 
	UK discovery cohort								UK validation cohort								US replication cohort (14,336)
	Pre Pandemic (n = 207,722)				Peri Pandemic (n = 207,722)				Pre Pandemic (n = 76,868)				Peri Pandemic (n = 76,868)				Pre Pandemic (n = 14,366)				Peri Pandemic (n = 14,366)
	Yes (%)	No (%)	Did not answer (%)		Yes (%)	No (%)	Did not answer (%)		Yes (%)	No (%)	Did not answer (%)		Yes (%)	No (%)	Did not answer (%)		Yes (%)	No (%)	Did not answer (%)		Yes (%)	No (%)	Did not answer (%)
Milk type
Whole milk	8.65387	85.6992	5.64697		9.05297	89.0811	1.86596		8.5	83.8	7.7		9.2	90.8	-		12.6	77.7	9.7		13.6	86.4	-
Semi-skimmmed	54.6793	39.6737	5.64697		55.8665	42.2675	1.86596		53	39.3	7.7		55.2	44.8	-		29.7	60.7	9.7		31.6	68.4	-
Skimmed	17.2586	77.0944	5.64697		17.6207	80.5134	1.86596		16.2	76.1	7.7		17.2	82.8	-		13.4	77	9.7		86.9	13.1	-
Plant	13.2725	81.0805	5.64697		15.126	83.0081	1.86596		14.5	77.8	7.7		19	81	-		22.9	67.5	9.7		28.3	71.7	-
Rarely/never	5.68019	88.6728	5.64697		6.30458	91.8295	1.86596		5.6	86.7	7.7		6.6	93.4	-		16.5	73.8	9.7		18.8	81.2	-
Other	1.45627	92.8968	5.64697		1.76438	96.3697	1.86596		1.6	90.7	7.7		2.1	97.9	-		3.5	86.9	9.7		4.5	95.5	-
Dietary preferences
Gluten free	3.26783	93.4624	3.26975		3.60963	95.5806	0.809736		3.4	92	4.6		4.1	95.9	-		4.5	89.4	6.2		5.5	94.5	-
Keto	0.647981	95.8724	3.47965		0.962825	98.0084	1.02878		0.8	94.6	4.6		1.7	98.3	-		1.9	92	6.2		2.6	97.4	-
Lactose free	2.15914	94.5711	3.26975		2.48746	96.7028	0.809736		2.4	93	4.6		3	97	-		4.3	89.6	6.2		5.4	94.6	-
Low calorie	3.06756	93.6627	3.26975		4.43814	94.7521	0.809736		4	91.4	4.6		6.6	93.4	-		7.1	86.8	6.2		12.3	87.7	-
Low carb	4.35197	92.3783	3.26975		6.0995	93.0908	0.809736		4.5	90.9	4.6		7.8	92.2	-		7.8	86	6.2		10.2	89.8	-
Low fat	4.86564	91.8646	3.26975		5.60268	93.5876	0.809736		4.8	90.6	4.6		5.4	94.6	-		4.5	89.3	6.2		5.6	94.4	-
Mixed	81.027	15.7032	3.26975		81.3568	17.8334	0.809736		78.9	16.5	4.6		79.9	20.1	-		79	14.8	6.2		81	19	-
Pescatarian	6.19723	90.533	3.26975		6.61461	92.5757	0.809736		5.8	89.6	4.6		6.6	93.4	-		4.4	89.4	6.2		5.5	94.5	-
Vegan	2.64151	94.0887	3.26975		2.65884	96.5314	0.809736		2.8	92.7	4.6		2.9	97.1	-		2.3	91.6	6.2		2.9	97.1	-
Vegetarian	12.5456	84.1846	3.26975		13.0968	86.0934	0.809736		11.5	83.9	4.6		12.5	87.5	-		9.8	84.1	6.2		11.8	88.2	-
Diet Supplements
Take supplements regularly/ 3-4x per week	43.5	56.5	0		48.8	51.2	0		35.3	60.1	4.6		44.5	55.5	0		62.1	31.7	6.2		72.3	27.7	0
Supplement type (multiple choice)
Calcium	6	37.5	-		6.2	42.5	-		4.5	32.6	-		4.9	39.6	-		23.5	42.8	-		24.3	48	-
Fibre (e.g. Metamucil, Citrucel, Inulin, Psylllium, Fybogel)	1.4	42	-		1.6	47.1	-		1.2	35.8	-		1.5	43	-		9.8	56.5	-		11.1	61.2	-
Garlic	1.3	42.1	-		1.5	47.3	-		0.9	36.2	-		1	43.5	-		0.9	65.3	-		1.2	71.1	-
Iron	3.7	39.8	-		4	44.8	-		4	33	-		4.6	39.9	-		5.8	60.4	-		6.2	66.1	-
Multivitamin	17.4	26.1	-		19.3	29.5	-		17.5	19.5	-		20.5	24	-		38.3	27.9	-		40.8	31.5	-
Fish or Omega 3 oils and capsules	14.7	28.8	-		16.1	32.7	-		10.6	26.4	-		12.8	31.7	-		20.6	45.6	-		22.4	49.9	-
Probiotic capsules/sachets	4.5	39	-		5.3	43.5	-		4.3	32.7	-		5.4	39.1	-		14.4	51.8	-		16.2	56.1	-
Vitamin C	8.6		-		10.2		-		7.7	92.3	-		9.9	0	-		15	0	-		19.7	0	-
Vitamin D	20.6	22.8	-		25.1	23.7	-		16.7	20.3	-		22.3	22.2	-		44.4	21.8	-		51.2	21.1	-
Zinc	4.7	38.8	-		6.1	42.7	-		4.1	32.9	-		5.8	38.7	-		5.5	60.7	-		9.4	62.9	-
Prefer not to say	0	43.4	-		0	48.7	-		0.1	37	-		0.1	44.4	-		0.1	66.1	-		0.1	72.2	-
Eating behaviours
Breakfast consumer	80.5909	16.1394	3.26975		83.3787	15.8115	0.809736		73.9	21.5	4.6		78.3	21.7	-		73	20.9	6.2		76.9	23.1	-
Worry lost control over how much eating	15.1544	81.5759	3.26975		18.4087	80.7815	0.809736		26.6	68.8	4.6		36.3	63.7	-		20.5	73.3	6.2		33.7	66.3	-
Food Security
Shiftwork - Work shifts outside of 7am-6pm	6.4206	93.5794	0		5.57572	94.4243	0		9.9	90.1	0		8.5	91.5	-		12.4	87.6	0		10.4	89.6	-

## Sheet: T8 PCA Loadings
UK discovery cohort (n = 207,722)						US replication cohort (n = 14,366)
Healthy pattern			Unhealthy pattern			Healthy pattern			Unhealthy pattern
Alcohol units	-0.214		Diet quality score	-0.759		Fast food	-0.173		Diet quality score	-0.7
Fast food	-0.144		Vegetable portions	-0.237		Non alcoholic fizzy drinks (not sugar free or diet)	-0.084		Physical Activity	-0.279
Processed white meat	-0.105		Physical Activity	-0.22		Alcohol units	-0.082		Salad (not garnish added to sandwiches)	-0.18
Processed red meat	-0.102		Oily fish	-0.211		Chips / fried potatoes	-0.07		Vegetable portions	-0.174
White bread	-0.093		Salad (not garnish added to sandwiches)	-0.178		Weekend nights sleep (Fri-Sat) (hrs mins)	-0.043		White fish not in batter or breadcrumbs	-0.12
Non alcoholic fizzy drinks (not sugar free or diet)	-0.054		White fish not in batter or breadcrumbs	-0.123		White bread	-0.042		Oily fish	-0.116
Alcohol frequency	-0.03		Live probiotic or fermented food products	-0.078		Refined breakfast cereals	-0.018		Alcohol frequency	-0.092
Chips / fried potatoes	-0.026		Alcohol frequency	-0.075		Processed white meat	-0.013		Live probiotic or fermented food products	-0.047
Red meat	-0.005		Beans or pulses	-0.048		Processed red meat	0.007		Beans or pulses	-0.043
Fruit juice/veg juice portions	-0.001		Weeknights sleep (Sun-Thurs) (hrs mins)	-0.004		Number of snacks	0.008		Weeknights sleep (Sun-Thurs) (hrs mins)	-0.027
Weekend nights sleep (Fri-Sat) (hrs mins)	0.003		Fruit juice/veg juice portions	-0.002		Weeknights sleep (Sun-Thurs) (hrs mins)	0.028		Fruit portions	-0.01
Weeknights sleep (Sun-Thurs) (hrs mins)	0.004		Weekend nights sleep (Fri-Sat) (hrs mins)	-0.001		Crisps / savoury snacks	0.036		Weekend nights sleep (Fri-Sat) (hrs mins)	0.003
Fruit portions	0.007		Fruit portions	0.001		Number of main meals (not including breakfast)	0.041		Number of main meals (not including breakfast)	0.012
White meat	0.008		Number of main meals (not including breakfast)	0.005		Fruit portions	0.053		Fibre-rich breakfast cereal	0.017
Number of snacks	0.008		Eggs	0.022		Pasta	0.103		Fruit juice/veg juice portions	0.029
Number of main meals (not including breakfast)	0.01		Number of snacks	0.026		Red meat	0.113		Alcohol units	0.086
White fish in batter or breadcrumbs	0.016		Fibre-rich breakfast cereal	0.053		Sweet	0.117		Eggs	0.096
Refined breakfast cereals	0.019		Wholemeal bread or chapattis	0.062		Ice cream / cream	0.125		Wholemeal bread or chapattis	0.126
Crisps / savoury snacks	0.115		Alcohol units	0.076		Fruit juice (not cordial or squash)	0.139		Fruit juice (not cordial or squash)	0.131
Ice cream / cream	0.131		Cheese / yoghurt	0.113		Fruit juice/veg juice portions	0.14		White fish in batter or breadcrumbs	0.136
Diet quality score	0.148		Fruit juice (not cordial or squash)	0.133		Alcohol frequency	0.152		White meat	0.142
White fish not in batter or breadcrumbs	0.15		White fish in batter or breadcrumbs	0.178		Rice	0.201		Cheese / yoghurt	0.247
Eggs	0.159		Rice	0.244		White meat	0.206		Refined breakfast cereals	0.288
Pasta	0.177		White meat	0.255		Vegetable portions	0.223		Rice	0.296
Rice	0.201		Refined breakfast cereals	0.267		Eggs	0.301		Red meat	0.317
Physical Activity	0.203		Ice cream / cream	0.27		White fish in batter or breadcrumbs	0.303		Non alcoholic fizzy drinks (not sugar free or diet)	0.327
Oily fish	0.213		Red meat	0.289		Physical Activity	0.317		Number of snacks	0.391
Vegetable portions	0.218		Pasta	0.32		Diet quality score	0.335		Pasta	0.395
Fruit juice (not cordial or squash)	0.249		Non alcoholic fizzy drinks (not sugar free or diet)	0.34		Wholemeal bread or chapattis	0.368		Ice cream / cream	0.412
Sweet biscuits, cakes, chocolate, sweets	0.284		Chips / fried potatoes	0.356		Beans or pulses	0.371		Chips / fried potatoes	0.415
Beans or pulses	0.371		Processed white meat	0.376		Fibre-rich breakfast cereal	0.377		Processed white meat	0.418
Salad (not garnish added to sandwiches)	0.434		Fast food	0.439		White fish not in batter or breadcrumbs	0.416		White bread	0.484
Live probiotic or fermented food products	0.446		White bread	0.45		Cheese / yoghurt	0.435		Processed red meat	0.522
Wholemeal bread or chapattis	0.485		Processed red meat	0.464		Live probiotic or fermented food products	0.459		Fast food	0.528
Fibre-rich breakfast cereal	0.562		Sweet biscuits, cakes, chocolate, sweets	0.547		Oily fish	0.547		Sweet biscuits, cakes, chocolate, sweets	0.553
Cheese / yoghurt	0.584		Crisps / savoury snacks	0.576		Salad (not garnish added to sandwiches)	0.55		Crisps / savoury snacks	0.581

## Sheet: T9 Dietary pattern geo-demograp
	UK discovery cohort																												US replication cohort
	Unhealthy dietary pattern														Healthy dietary pattern														Unhealthy dietary pattern														Healthy dietary pattern
	Lowest quartile (n=51,930)							Highest quartile (n=51,930)							Lowest quartile (n=51,930)							Highest quartile (n=51,930)							Lowest quartile (n=3591)							Highest quartile (n=3591)							Lowest quartile (n=3591)
Participant characteristics
Sex	Male (%)	Female (%)						Male (%)	Female (%)						Male (%)	Female (%)						Male (%)	Female (%)						Male (%)	Female (%)						Male (%)	Female (%)						Male (%)	Female (%)
	21.2	78.7						39.8	60.1						37.7	62.3						27.5	72.5						12.1	87.9						23.2	76.7						18.5	81.4
	Median	25th	75th					Median	25th	75th					Median	25th	75th					Median	25th	75th					Median	25th	75th					Median	25th	75th					Median	25th	75th
Age (Yrs)	61	53	68					53	43	62					56	46	64					61	52	67					63	53	69					43	57	67					54	40	66
Smoking
Smoking status	Yes (%)	Not Currently (%)	Never (%)	Did not answer (%)				Yes (%)	Not Currently (%)	Never (%)	Did not answer (%)				Yes (%)	Not Currently (%)	Never (%)	Did not answer (%)				Yes (%)	Not Currently (%)	Never (%)	Did not answer (%)				Yes (%)	Not Currently (%)	Never (%)	Did not answer (%)				Yes (%)	Not Currently (%)	Never (%)	Did not answer (%)				Yes (%)	Not Currently (%)	Never (%)	Did not answer (%)
	1.2	14.3	37.4	47				2.8	13.5	35.2	48.5				4.1	16	32.7	47.2				0.8	12.6	40.1	46.5				1.7	27	71.3	0				4.3	24	71.6	0.1				4.4	23.8	71.8	0
Health
Do you suffer from the following:	Yes (%)	No (%)	Did not answer (%)					Yes (%)	No (%)	Did not answer (%)					Yes (%)	No (%)	Did not answer (%)					Yes (%)	No (%)	Did not answer (%)					Yes (%)	No (%)	Did not answer (%)					Yes (%)	No (%)	Did not answer (%)					Yes (%)	No (%)	Did not answer (%)
Diabetes	2.8	97.2	0					3.9	96	0					4.6	95.4	0					2.2	97.7	0					3	97	-					5.8	94.2	-					5	95	-
Heart disease	3.4	96.5	0					3.1	96.9	0					3.8	96.2	0					3.4	96.6	0					5.4	94.6	-					5.8	94.2	-					5	95	-
Kidney disease	0.7	99.3	0					0.9	99.1	0					0.9	99.1	0					0.7	99.3	0					0.9	99.1	-					1.5	98.5	-					1.7	98.3	-
Ethnicity
United Kingdom	Yes (%)	No (%)						Yes (%)	No (%)						Yes (%)	No (%)						Yes (%)	No (%)						United states	Yes (%)	No (%)					United states	Yes (%)	No (%)					United states	Yes (%)	No (%)
Asian UK	0.6	99.4						0.7	99.3						0.8	99.2						0.5	99.5						Asian	1.7	98.3					Asian	3.5	96.5					Asian	3.1	96.9
Black UK	0.2	99.8						0.3	99.7						0.3	99.7						0.1	99.9						Black/African American	2.3	97.7					Black/African American	3	97					Black/African American	2.8	97.2
Chinese UK	0.2	99.8						0.2	99.8						0.3	99.7						0.1	99.9						Native American	0.8	99.2					Native American	1.4	98.6					Native American	1.3	98.7
Middle Eastern UK	0.2	99.8						0.2	99.8						0.2	99.8						0.2	99.8						Native Hawaiian or Island Pacific	0.2	99.8					Native Hawaiian or Island Pacific	0.4	99.6					Native Hawaiian or Island Pacific	0.4	99.6
White UK	97.5	2.5						97.3	2.7						97	3						97.7	2.3						White	91.6	8.4					White	89.9	10.1					White	90.1	9.9
Mixed other UK	0.7	99.3						0.8	99.2						0.8	99.2						0.7	99.3						Other	1.4	98.9					Other	0.9	99.1					Other	1.4	98.6
Mixed white/black UK	0.2	99.8						0.3	99.7						0.3	99.7						0.2	99.8
Other	0.4	99.6						0.2	99.8						0.3	99.7						0.4	99.6
Prefer not to say	0.1	99.9						0.2	99.8						0.2	99.8						0.1	99.9
Geographical
	England (%)	Scotland (%)	Wales (%)	Northern Ireland (%)	Did not answer (%)			England (%)	Scotland (%)	Wales (%)	Northern Ireland (%)	Did not answer (%)			England (%)	Scotland (%)	Wales (%)	Northern Ireland (%)	Did not answer (%)			England (%)	Scotland (%)	Wales (%)	Northern Ireland (%)	Did not answer (%)
UK location	83.2	4.4	3.7	0.4	8.3			79.1	6.3	5.1	0.7	8.9			81	5	5.1	0.6	8.3			81	5.7	4.1	0.5	8.7
Index of Multiple Deprivation
1	1							1.9							1.9							0.9
2	2.3							3.3							3.5							2.1
3	3.9							4.6							5.2							3.5
4	6							6.3							6.5							5.6
5	7.7							7.7							7.9							7.5
6	10.1							9.5							9.7							9.6
7	11.2							10.6							10.8							11.1
8	12.6							11.6							11.9							12.1
9	14							12.8							13.2							13.6
10	18.1							16							15.4							18.9
Missing (0)	13.1							15.8							13.9							14.9
Eating behaviours
	Pre-pandemic			Peri-pandemic				Pre-pandemic			Peri-pandemic				Pre-pandemic			Peri-pandemic				Pre-pandemic			Peri-pandemic				Pre-pandemic			Peri-pandemic				Pre-pandemic			Peri-pandemic				Pre-pandemic			Peri-pandemic
	Yes (%)	No (%)	Did not answer (%)	Yes (%)	No (%)	Did not answer (%)		Yes (%)	No (%)	Did not answer (%)	Yes (%)	No (%)	Did not answer (%)		Yes (%)	No (%)	Did not answer (%)	Yes (%)	No (%)	Did not answer (%)		Yes (%)	No (%)	Did not answer (%)	Yes (%)	No (%)	Did not answer (%)		Yes (%)	No (%)	Did not answer (%)	Yes (%)	No (%)	Did not answer (%)		Yes (%)	No (%)	Did not answer (%)	Yes (%)	No (%)	Did not answer (%)		Yes (%)	No (%)	Did not answer (%)	Yes (%)	No (%)	Did not answer (%)
Breakfast consumer (Y/N)	85	15	0	84.4	14.9	0.7		80.1	19.9	0	81.6	17.4	1		67.7	32.3	0	70.8	28.3	0.9		93.4	6.6	0	92.3	7	0.7		79.1	20.9	-	77.5	22.5	-		74.8	25.2	-	75.7	24.3	-		65.7	34.3	-	66.8	33.2	-
Worry lost control over how much eating (Y/N)	7.7	92.3	0	16.1	83.3	0.7		26.9	73.1	0	20.9	78.1	1		20	80	0	21.2	77.9	0.9		11.6	88.4	0	14.2	85	0.7		11.8	88.2	-	39.4	60.6	-		34	66	-	27.6	72.4	-		25.6	74.4	-	32.4	67.6	-
Disruption index
0	13.3							5.7							8.4							11.1							9							4							5.7
1	28.3							18.7							22							27.7							25.4							16.6							18.3
2	28.5							26.3							26.9							28.6							26.1							29.5							27.7
3	18.9							26.1							23.7							20.1							19.7							20.6							19.5
4	8.8							17.2							14.2							10							12.5							16.5							17.2
5	2.2							6							4.7							2.5							7.3							12.8							11.5
[truncated: 6 more columns]

[truncated: 2 more sheets: T10 Change according to dietary, T11 Percentile cut offs for exc]
